# Supplementary material for: Genomic insights into novel extremotolerant bacteria isolated from the NASA Phoenix mission spacecraft assembly cleanrooms
Source: Springer Nature journal article supplement (doi:10.1186/s40168-025-02082-1), 2025-05-11
Supplement: MOESM2 [file 40168_2025_2082_MOESM2_ESM.pdf]

## Supplementary material

### **Genomic Insights into **Novel Extremotolerant** Bacteria Isolated from the NASA Phoenix Mission Spacecraft Assembly Facility**

Júnia Schultz<sup>1</sup>, Tahira Jamil<sup>1</sup>, Pratyay Sengupta<sup>2,3,4</sup>, Shobhan Karthick Muthamilselvi Sivabalan<sup>4</sup>, Anamika Rawat<sup>1</sup>, Niketan Patel<sup>1</sup>, Srinivasan Krishnamurthy<sup>5</sup>, Intikhab Alam<sup>1</sup>, Nitin K. Singh<sup>6</sup>, Karthik Raman<sup>3,4,7</sup>, Alexandre Soares Rosado<sup>1,8\*</sup>, Kasthuri Venkateswaran<sup>6\*</sup>

<sup>1</sup>Biological and Environmental Science and Engineering Division, King Abdullah University of Science and Technology, Thuwal, Makkah, 23955, Saudi Arabia

<sup>2</sup>Department of Biotechnology, Bhupat and Jyoti Mehta School of Biosciences, Indian Institute of Technology Madras, Chennai, 600036, India

<sup>3</sup>Center for Integrative Biology and Systems Medicine (IBSE), Indian Institute of Technology Madras, Chennai, 600036, India

<sup>4</sup>Robert Bosch Centre for Data Science and Artificial Intelligence (RBCDSAI), Indian Institute of Technology Madras, Chennai, 600036, India

<sup>5</sup>Microbial Type Culture Collection and Gene Bank (MTCC), Institute of Microbial Technology, Chandigarh, 160036, India

<sup>6</sup>NASA Jet Propulsion Laboratory, California Institute of Technology, Pasadena, CA, USA

<sup>7</sup>Department of Data Science and AI, Wadhvani School of Data Science and AI, Indian Institute of Technology Madras, Chennai, Tamil Nadu, 600036, India

<sup>8</sup>Bioscience Program, Biological and Environmental Science and Engineering (BESE), Division, King Abdullah University of Science and Technology (KAUST), Thuwal, Makkah, 23955, Saudi Arabia

\* These authors share senior authorship.

Correspondence:

kjvenkat1955@gmail.com

alexandre.rosado@kaust.edu.sa

## SUPPLEMENTARY FIGURES

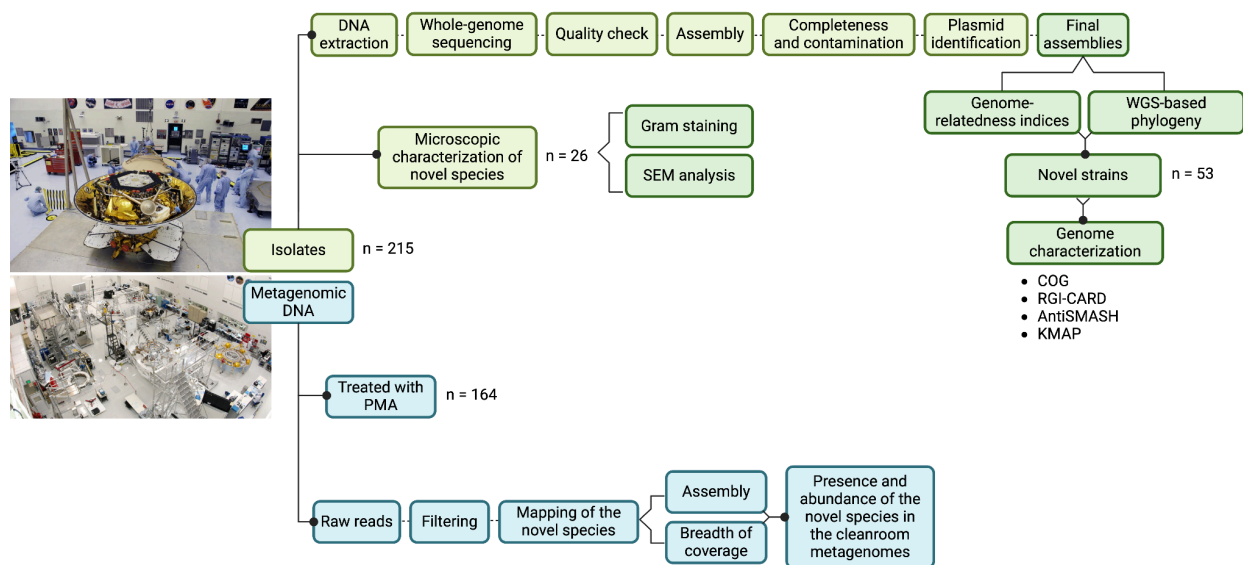

**Supplementary Figure S1.** A schematic flow chart of the experimental design and analyses used to describe 53 novel strains from the Phoenix mission spacecraft assembly facility, and to evaluate their persistence in the cleanrooms through metagenomic analysis.

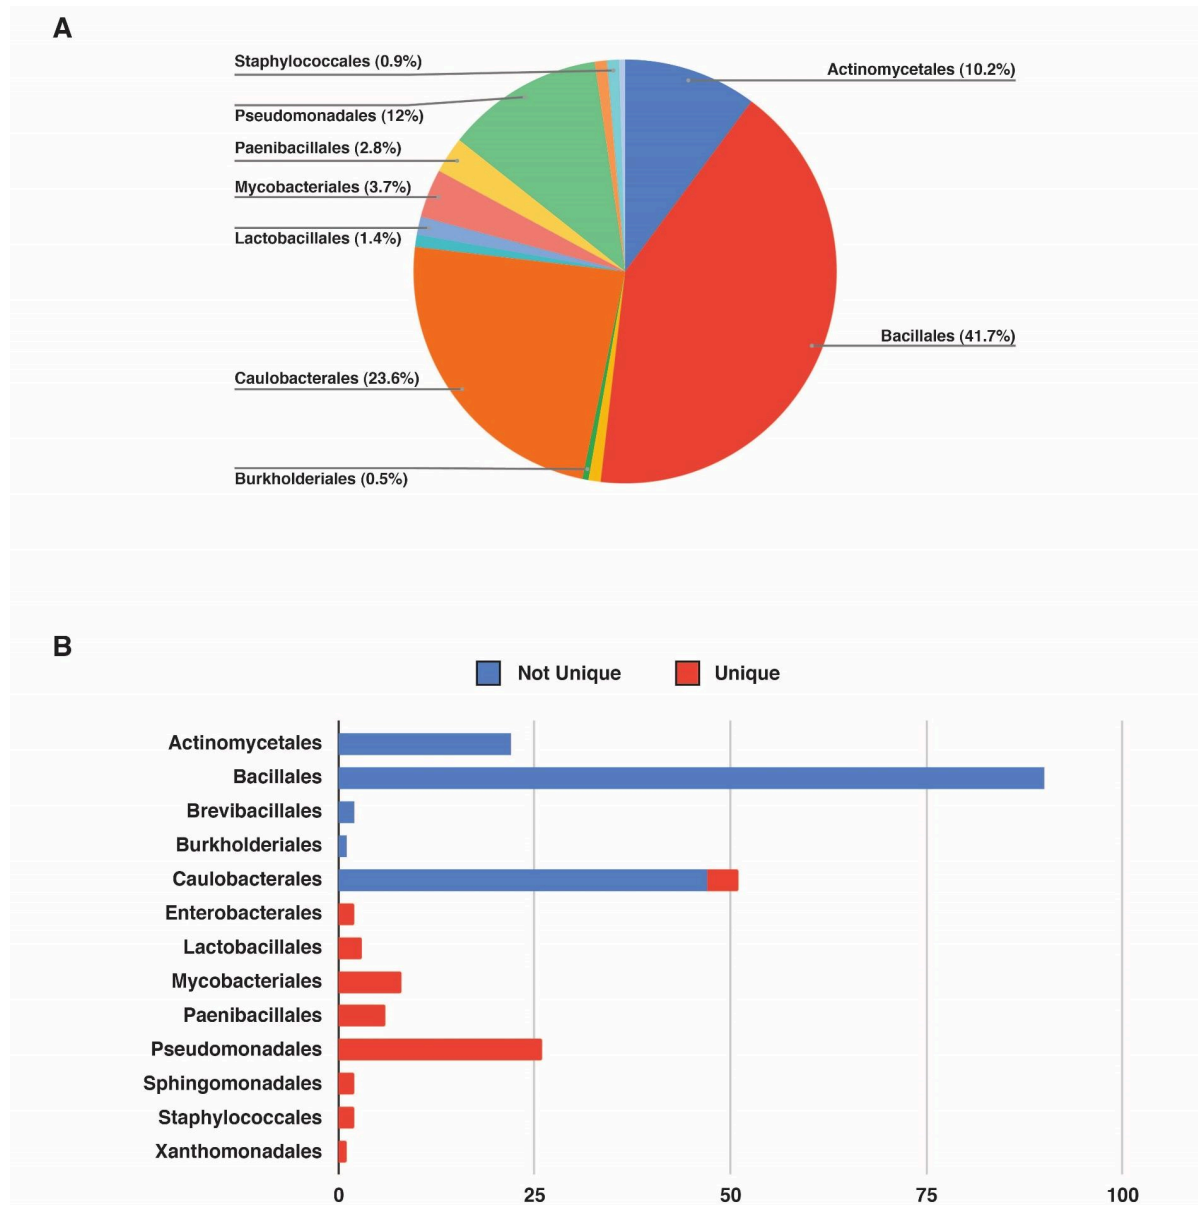

**Supplementary Figure S2.** Taxonomic distribution of isolated species. A. Order-level classification of 215 isolated species, showing their phylogenetic diversity. B. Proportion of novel species within each order, highlighting the contribution of this study to the discovery of novel species in each taxonomic group.

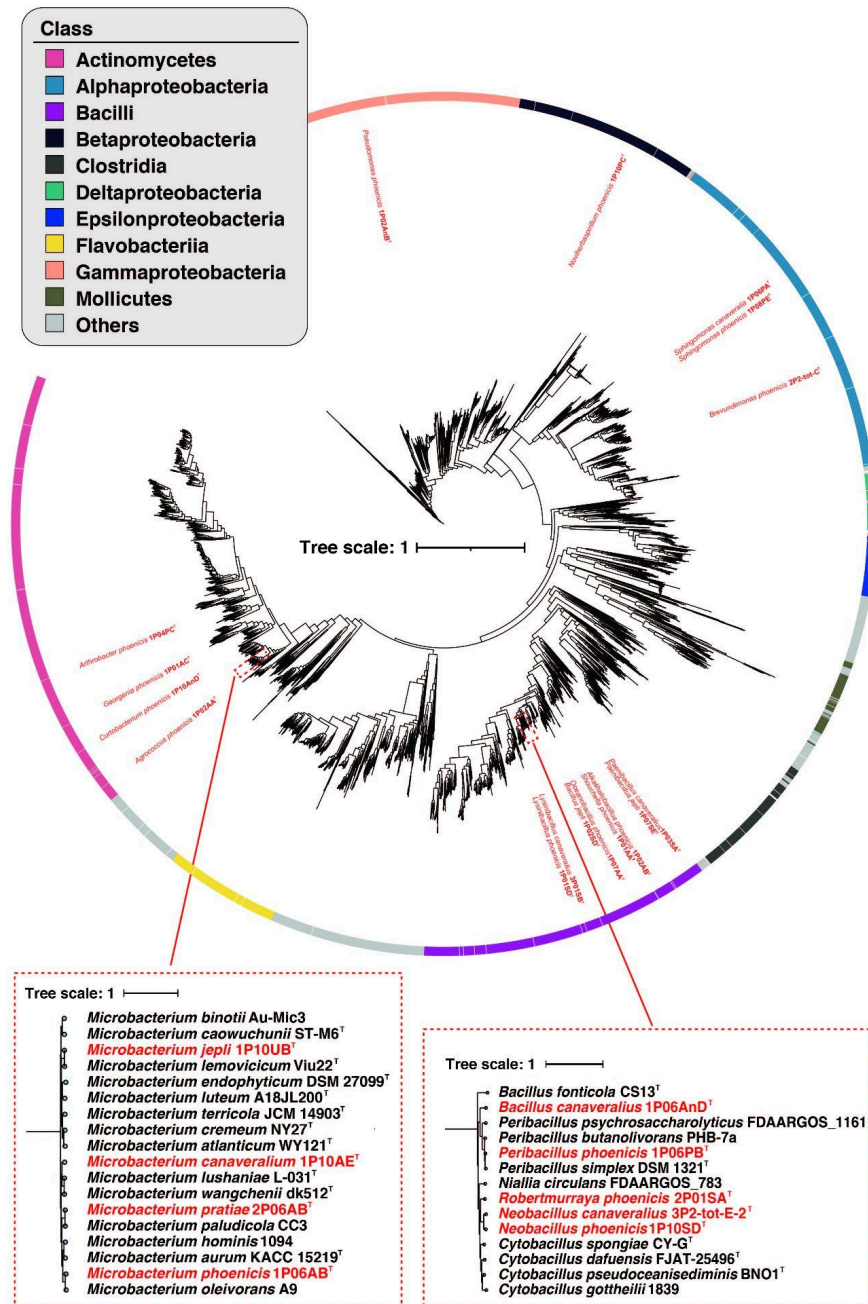

**Supplementary Figure S3.** A bacterial tree of life containing the 26 novel species isolated from Phoenix mission spacecraft based on 4,441 complete, non-anomalous representative genomes of Bacteria from the NCBI Reference Sequence database and built using the 16 SCG-set as previously described in Hug *et al.* (2016).

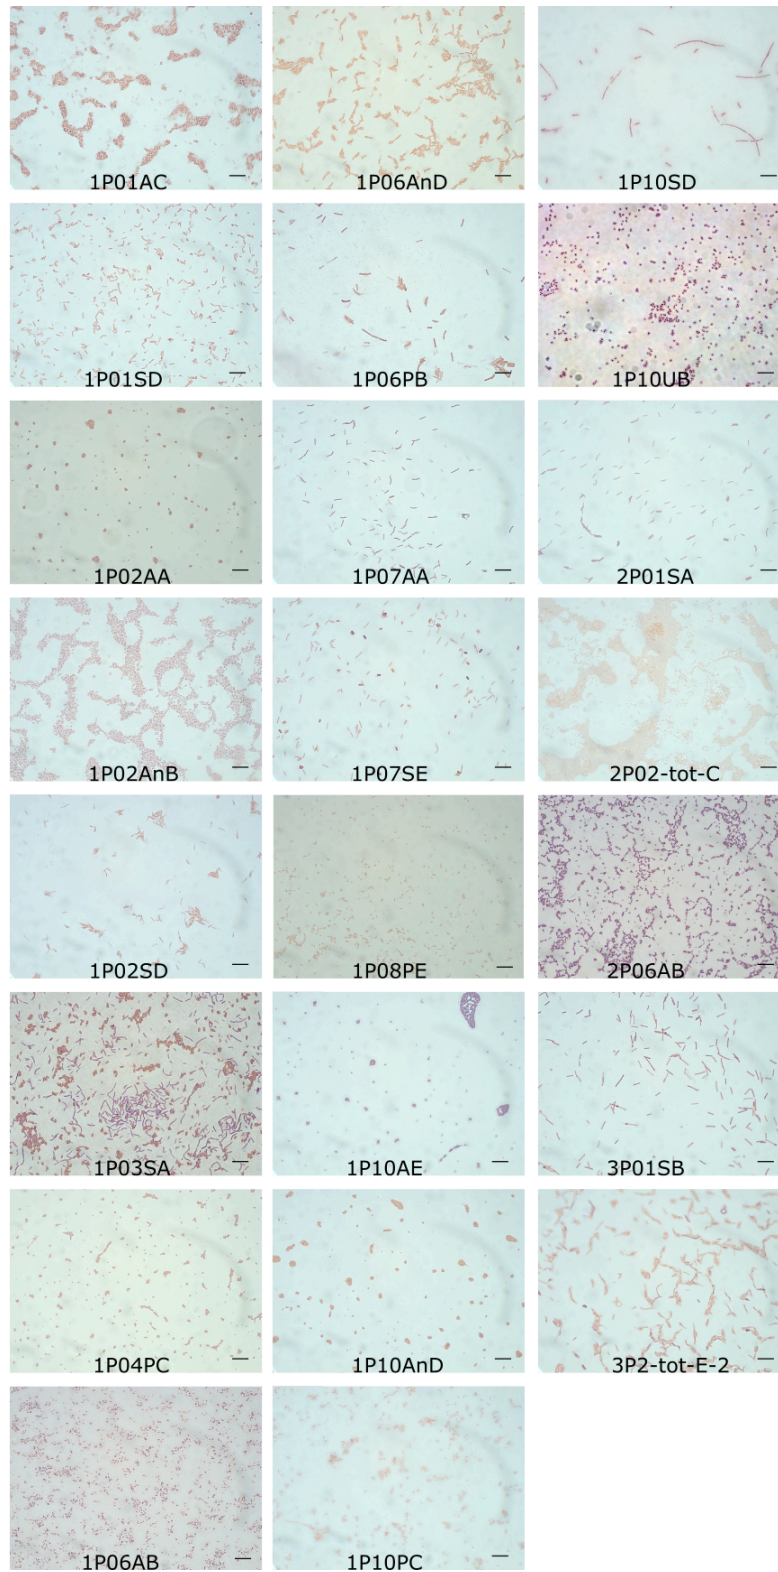

**Supplementary Figure S4.** Gram-staining images of the novel species isolated from Phoenix spacecraft mission.



A

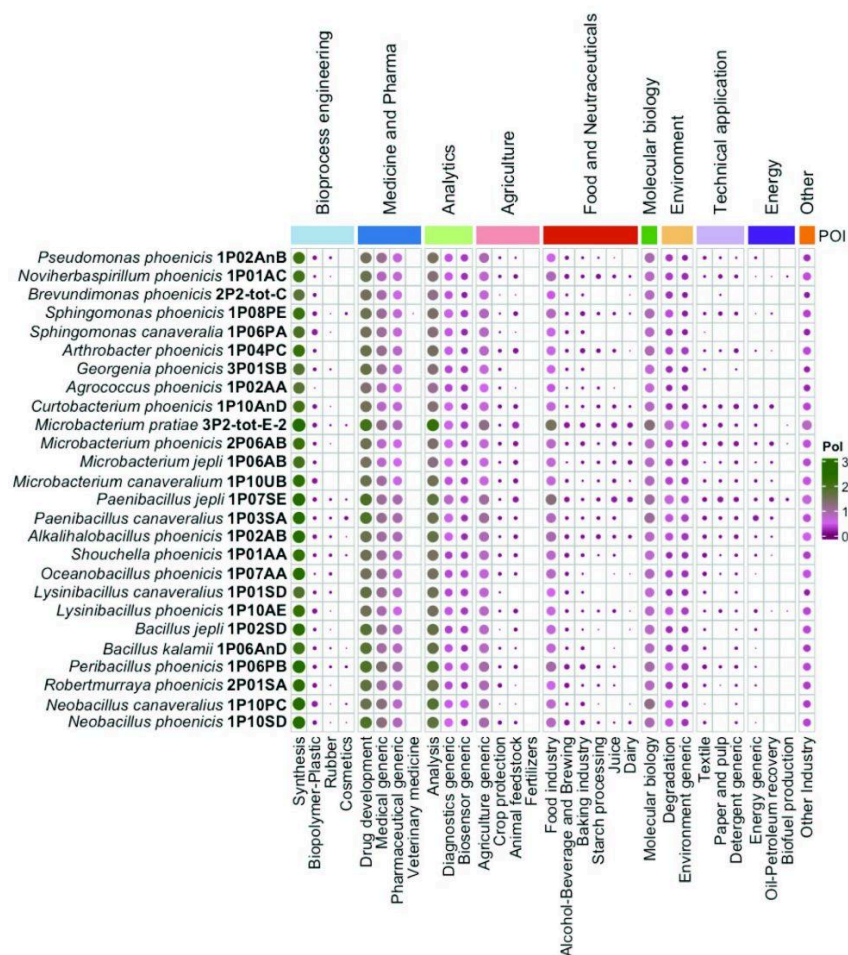

B

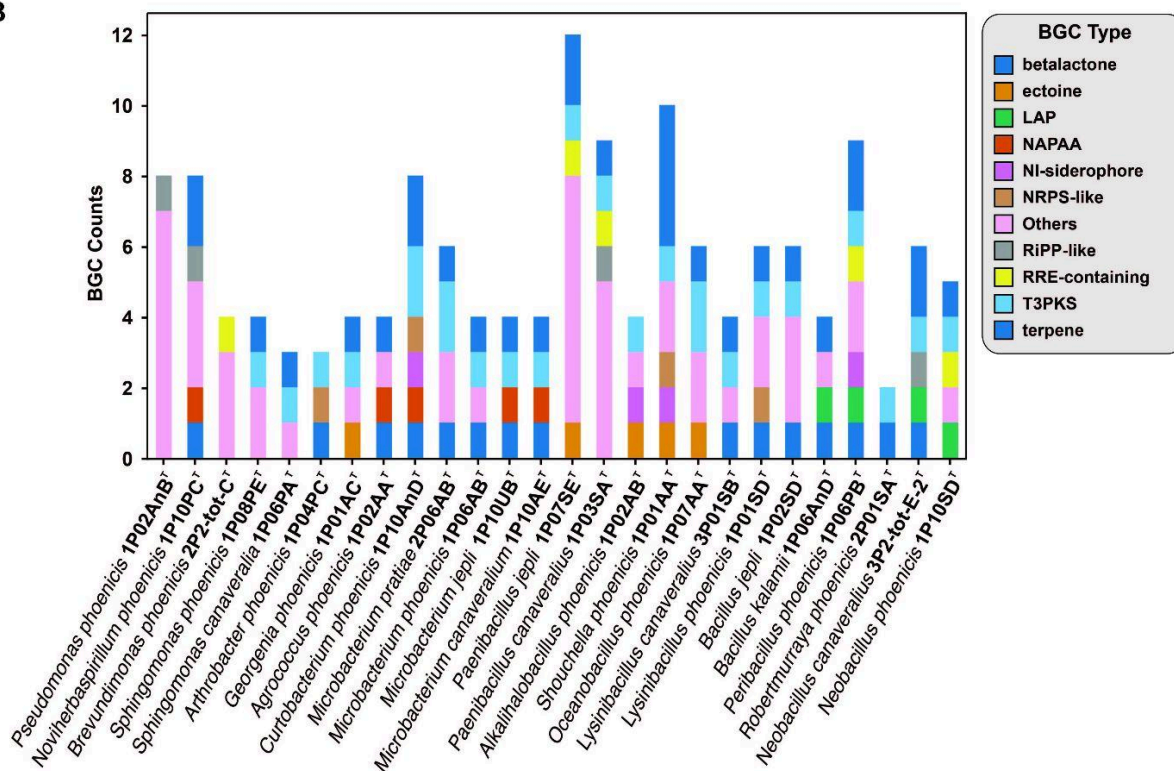

**Supplementary Figure S5:** A. Identification of Proteins of Interest (PoI) using KMAP with applications in various industries, leveraging the unique functional capabilities of novel species from NASA cleanrooms. B. Secondary metabolite-producing biosynthetic gene clusters of novel Phoenix spacecraft bacterial species identified by AntiSMASH.
